# Supplementary material
Source: Springer Nature journal article supplement (https://www.springermedizin.de/resource/supplementary/12936_2007_432_MOESM1_ESM.pdf/9547434)

*An. neivai*

*An. homunculus*

*An. bellator*

*An. boliviensis*

*An. cruzii*

*An. bambusicolus*

*An. laneanus*

*An. homunculus*

Atlantic forest domain

Atlantic forest remains

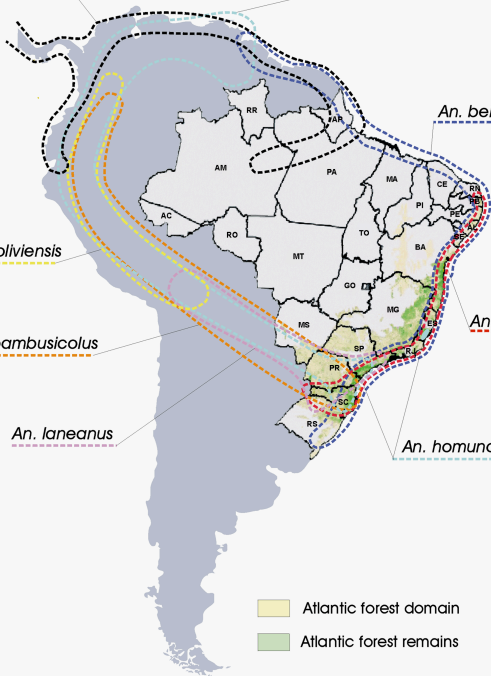

Supplement: MOESM1 [file 9547434]
